# Supplementary material for: GMP Synthetase: Allostery, Structure, and Function
Source: MDPI journal article supplement (doi:10.3390/biom13091379), 2023-09-12
Supplement: s1 [file s1]

Sequence alignment of representatives of GMPs. The sequences of *Mj*GATase and *Mj*ATPase subunits have been fused in the alignment. The sequence alignment has been performed using the program ESPrnt [65].

1 10 20 30

E.coli .....MTENIHKKHRLILDLFGSQYTQLVARRVRELVGYCELWAW  
H.sapiens MALCNGDSKLENAGGDLKDGHHHYEGAVVILDAAGQYGVKVIDRRVRELVVQSEIFPL  
P.falci parum .....MEGEYDKLLVLNFGSQYFHLIVKRLNHIKIFSETKDY  
M.jannaschii .....MILVILDLNGGQYVHRIHRSLSKYITGVSSKIVPN

40 50 60 70 80 90

E.coli DVTEAQIRLDFNPSGIIILSGGPESTTEENSPRAP...QYVFEAGVPVFGVCGMQT  
H.sapiens ETPAFAIKLEQGFRAIIISGGPNSVYAEDA PWFDP...AIFTIGKPVLFCHCMGMQM  
P.falci parum GVELKDKIDMNIKGVILSGGPIYSVTEAGSPHLKKEVFYFLEKKIPIFGICMGMOE  
M.jannaschii TTPLEELISNKEVKGIIILSGGPDIEKAKNCIDIA.....LNAKIPILGICLGHOL

100 110 120 130

E.coli MAMQLGCHVEASNEREFGYAQVEVVNDS....ALVRGLEDALTAD.....  
H.sapiens MNKVFGGTVHKKSVREDDGVFNISVDNTC....SLFRGLQKE.....  
P.falci parum IAVQMNGGVKKSKTSIEYCTDVNII LRNDNINNITYCRNFGDSSSSAMDLYSNYKLMNE  
M.jannaschii TALAYGCEVGRAEAEIEYALTKVYVDKEN....DLFKNVPR....E.....

140 150 160 170 180

E.coli .....GKPLLDVWMSHGDKVTIAPSDFITVASIESCFPAIMANEEERFYGVQFH  
H.sapiens .....EVVLLTHGDSVDKVADGFKVVARSG.NIVAGIANESKKLYGAQFH  
P.falci parum TCCLFENIKSDITTVMMNRNDEVTKIPENFYLVSSSENCLICSIIYNKEYNIFYGVQYH  
M.jannaschii .....FNAAWASHKDEVKVPEGFEILAHSDIOVEAMKHKTKPFYGVQFH

190 200 210 220 230

E.coli FEVTHTRCGMRMLERFVRDTCQCEALWTFAKIIDDVARIREQVGDQKVLILSGGV  
H.sapiens FEVGLTENGGVILKNFLYDIAGCSGTFTVQNRLECIREDIKERVGTSSKVLVLSSGGV  
P.falci parum FEVYESLDGELMFYFNAYNICKCKKQFDPRIYHELELKNLEKYKHHDHYVIAAMSGGV  
M.jannaschii FEVAHTEYGNELKNFKCKVCGYKFFEMDPKKFIDEAVERIKQQISDRKAIIALSGGV

240 250 260 270 280 290

E.coli DSSVTAMTLHRAIG.KNLTICVFVDNGLRLNEAEQVLDMFGDHFG.LNIIVHVEAEDR  
H.sapiens DSTVCTALLNRLNQEQVIAVHIDNGFMRKRESQSVEEALKKLGL..IQVKVINAHHS  
P.falci parum DSTVAAYTHKIFK.ERFFGIFIDNGLLRKNEAENVYTFLKSTFFDMNITKIDASEN  
M.jannaschii DSSVAAVLTHKAIIG.DKLTAVFVDICLMRKGREVEVEKTFRDKLG.LNLIVVDKDR

300 310 320

E.coli FLS.....ALAGENDPEAKRKIIIG..RVFVEVFDEEATKLED  
H.sapiens FYNGTITLPISEDRTPRKRIKTLNMTTSPERRKIIIGDTFVKIANEVI GEMNLKP  
P.falci parum FLS.....NLQGVTDPRITKKENYRGNYLLKNLKKRKYIDIEY  
M.jannaschii FELN.....AKGVTDPEBKRKIIIG..KLFIDVFEEIADIKKA

330 340 350 360 370 380

E.coli VK..WLAOCTIYPDVIESAASATG.KAHV.IKSHHNVGGLPKEMKMG..LVEPLKELFK  
H.sapiens EEVFLAOCTLRPDIESASLVASGKAEIKITHNDTELIRKLREEGKVIEPLKDFHK  
P.falci parum KQTFLLOCTLYPDIESKCSKN..LSDTIKTHHNVGGLPKNLKF..LFEPFKYLFK  
M.jannaschii EV..LVQCTIAPDRIETQG.....KIKSHHNV..LPHGMVLE..VVEPLRELYK

390 400 410

E.coli DEVRKIGDELGLPYDMLYRHPPFGPGLGVRVLG.....  
H.sapiens DEVRIILGRELGLPEELVSRHPPFGPGLAIRVICAEEPYICKDFPETNNILKIVADFS  
P.falci parum DEVKTLRELNLPEEITNRHPPFGPGLAIRVIG.....  
M.jannaschii DEVRLLADELGLPDSIVYRPPFGPGLAVRVLG.....

420 430 440 450 460 470

E.coli .EVKKEYCDLRRADAFIFI EELRKADLYDKVSQAFTVFLPVRSVGVMGDGGRKYDWV  
H.sapiens ASVKKPHITLQRVKACTTEEDQEKLMQITSLSLNAFLLPKIKTVGVQGDGRSYSYVC  
P.falci parum .EINKHKLNLILREVDIFINDLKQYGLYNQISQAFVILSSKSVGVGRDARSYDYVC  
M.jannaschii .EVTEEKLNICREANALIVEEVKKANLDKDLWQYFAVVLDCATGVKGDREYVNIIV

E.coli .....  
H.sapiens GISSKDEPDWESLIFLARLIPRMCHNVNRVVYIFGPPVKEPPTDVPFTFLTGVLSL  
P.falci parum .....  
M.jannaschii .....

E.coli .....SLRAVETID  
H.sapiens LRQADFEAHNILRESGYAGKISQMPVILTPLHFDRDPLQKQPSQCRSVVIRTFITSD  
P.falci parum .....VLRAVKTSS  
M.jannaschii .....ALRMVKSLSL

480 490 500 510 520

E.coli FMTAHHWAHLPYDFLGRVSNRIINEVN...GISRVVYDISCKPPATIEWE  
H.sapiens FMTGIPATPGNEIPEVVLKMTVEIKKIPGISRIMYDLTSKPPGTIEWE  
P.falci parum FMTANWYQIPYDILDKITIRILSEVK...GVNRILYDVSSKPPATIEFE  
M.jannaschii AMTAHVPEIPFDLLKRISKRITSEIP...NVARVVFDTIDKPPATIEFE

**Supplementary Figure S1.** Sequence alignment of representatives of GMPs. The sequences of *Mj*GATase and *Mj*ATPase subunits have been fused in the alignment. The sequence alignment has been performed using the program ESPrnt [65].

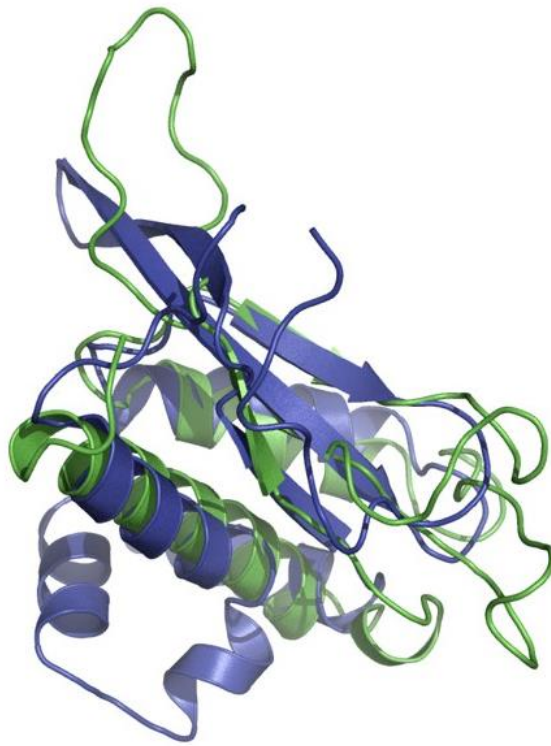

**Supplementary Figure S2.** Subdomains D1 (blue) and D2 (green) in *HsGMPS* display very similar fold with a rmsd of 2.2 Å.

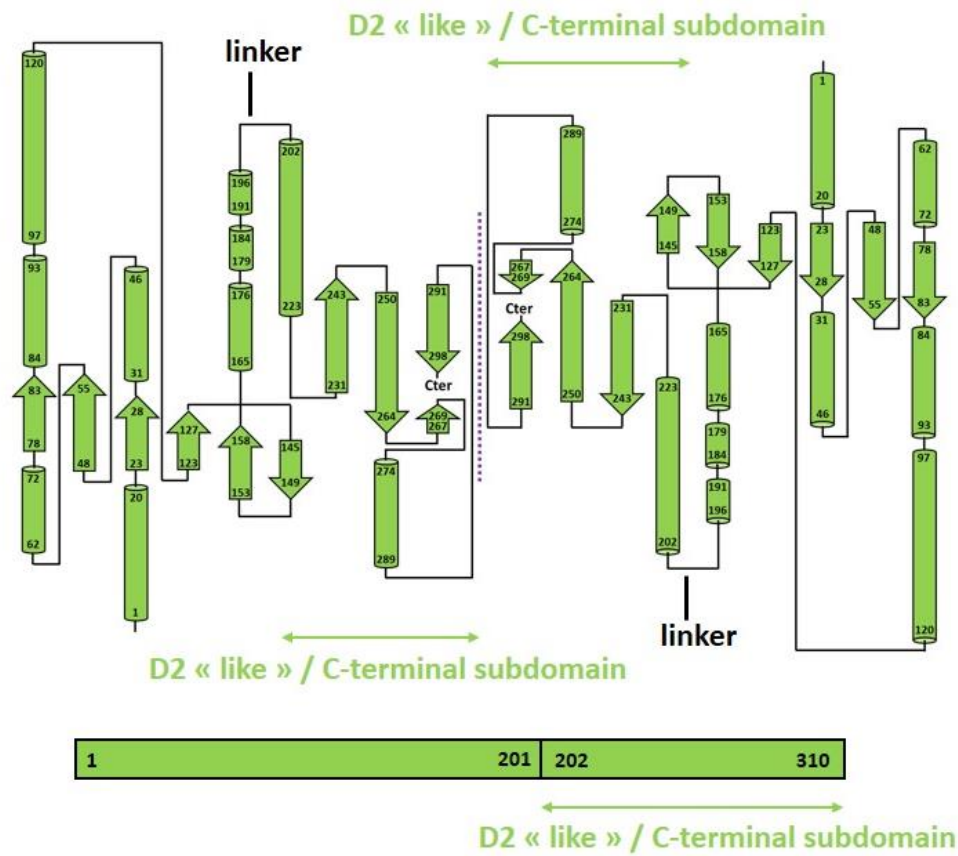

**Supplementary Figure S3.** Topology diagram of the *MjATPPase* subunit structure. The structure of the dimerization subdomain and the inter-subunit contacts in the dimer of the *MjATPPase* subunit is similar to the counterparts in the two domain GMPS structures.
